# Supplementary material
Source: Springer Nature journal article supplement (https://www.springermedizin.de/resource/supplementary/12967_2013_1734_MOESM6_ESM.pdf/9575138)

**A**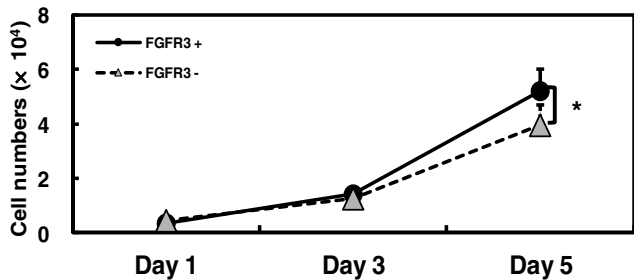**B**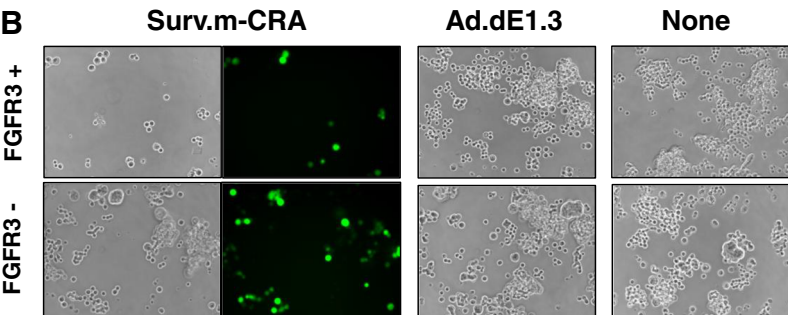**C**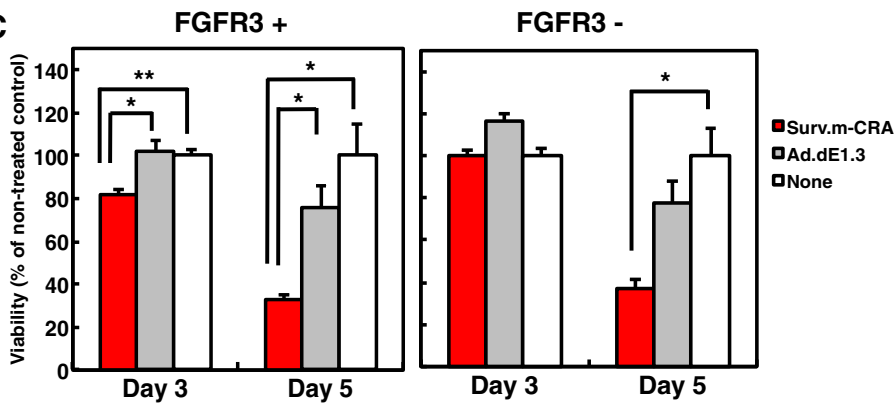

Supplement: MOESM6 [file 9575138]
